# Supplementary material for: Myogenin is required for assembly of the transcription machinery on muscle genes during skeletal muscle differentiation
Source: PubMed Central journal article supplement (PMC7815108; doi:10.1371/journal.pone.0245618), 2021-01-19
Supplement: pone.0245618.s001.pdf [file pone.0245618.s001.pdf]

## Oligonucleotides used in study

Cloning primers:

Murine MyoD F 5' ATGGAGCTTCTATCGCCG 3'

Murine MyoD F 5' ATGGAGCTTCTATCGCCG 3'

Murine myog sgRNA Exon-1 Top 5' CACCGTCAGTCCGCTCATAGCCCCGGGGG 3'

Bottom 5' AAACCCCCGGGCTATGAGCGGACTGAC 3'

Quantitative reverse transcriptase-PCR (qRT-PCR) primers:

18S rRNA F 5' CGCCGCTAGAGGTGAAATTCT 3'

R 5' CGAACCTCCGACTTTCGTTCT 3'

Hprt11 F 5' TGACACTGGCAAACAATGCA 3'

R 5' GGCCTTTTCACCAGCAAGCT 3'

Murine Acta1 F 5' GGCACCCAGGGCCAGAGTCA 3'

R 5' TCATCCCCGGCAAAGCCAGC 3'

Murine Lmod2 F 5' ACCTTATCCCGATTTGCTGAAG 3'

R 5' ACCTTGAGCATGTCTGCAATG 3'

Murine Tnni2 F 5' GCCGCCGAGAATCTGAGA 3'

R 5' GACATGGAGCCTGGGATGTG 3'

Murine Mylpf F 5' GGCTGCCGGGGCAGGACTAT 3'

R 5' CGGCCCATGGCTGCAAAGGT 3'

Murine MyoD F 5' GCCGGTGTGCATTCAA 3'

R 5' CACTCCGGAACCCCAACAG 3'

Murine Myog F 5' GACCTGATGGAGCTGTATGAG 3'

R 5' CTGAAGGTGGACAGGAAGG 3'

Murine Myf5 F 5' AGCTTGCAAGAGGAAGTCCACTA 3'

R 5' CTACGCTCGCGCATGGT 3'  
 Murine Myf6 F 5' CCCTGAAGCGTCGGACTGT 3'  
 R 5' ATGGCACTCCGCAGAATCTC 3'  
 Murine Myomaker (Tmem8c) F 5' CTGTGCTGTGCTTCATGC 3'  
 R 5' GCCTATCTGCTGGGTGTAGA 3'  
 Murine Myomixer (Gm7325) F 5' CTGAGCTCCCAAGACATGAG 3'  
 R 5' CCAATCTCTCCTCCTCTGG 3'  
 Murine ID3 F 5' ATGAAGGCGCTGAGCCCG 3'  
 R 5' GTGGCAAAGCTCCTCTTGTC 3'  
 Murine NP1 F 5' TTCTCCTCTCCCCTGCGG 3'  
 R 5' GCACGTAAGTCCACTGCG 3'  
 Murine Tnnt1 F 5' GGAGAAGATGCGGAAGGAG 3'  
 R 5' CAGTCTGTCGCTTCCCAC 3'  
 Chromatin immunoprecipitation (ChIP) primers:  
 Murine Igh F 5' GCCGATCAGAACCAGAACACCTGC 3'  
 R 5' TGGTGGGGCTGGACAGAGTGTTTC 3'  
 Murine Lmod2 Promoter F 5' CACCCTCTCCACATTGTCAC 3'  
 R 5' AAAGAACCAGGCATTCAAGG 3'  
 Murine Myh3 Promoter F 5' CCTTTCTCTTCAGGCCACTAC 3'  
 R 5' TGACAGGGAGCTATGCCA 3'  
 Murine Tnni2 Promoter F 5' GCCAAAGGAGCAAGAGTTAAAAAT 3'  
 R 5' AGGAGAAAGTGTTCCCAAATGTC 3'
